# Supplementary material
Source: Springer Nature journal article supplement (https://www.springermedizin.de/resource/supplementary/12879_2011_2134_MOESM3_ESM.pdf/9443730)

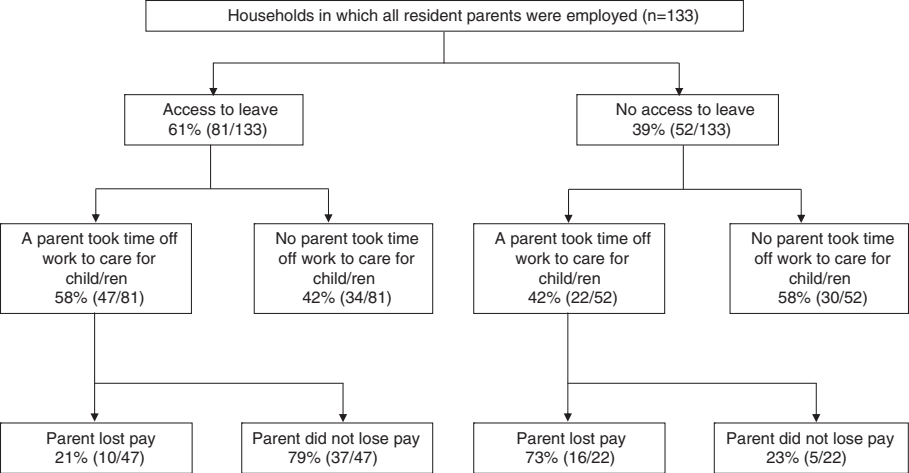

(+ 1 missing)

Supplement: MOESM3 [file 9443730]
